# Supplementary material for: Efficacy and Safety of Flexible Versus Fixed Dosing Intervals of Insulin Glargine 300 U/mL in People with Type 2 Diabetes
Source: PubMed Central journal article supplement — Diabetes Technol Ther. 2016 Apr 1;18(4):252–7. doi: 10.1089/dia.2015.0290 (PMC4827283; doi:10.1089/dia.2015.0290), 2016-04-01
Supplement: Supp_Figure1.pdf [file Supp_Figure1.pdf]

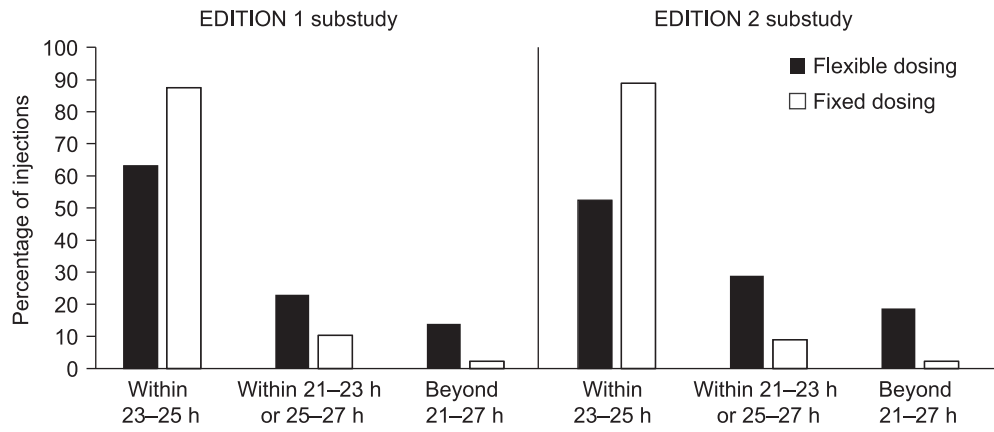

**SUPPLEMENTARY FIG. S1.** Percentage of injections by the time interval between two consecutive injections for the flexible-dosing and fixed-dosing insulin glargine 300 U/mL regimens (pooled data, EDITION 1 and EDITION 2 substudies) during Months 6–9 (safety population).
