# Supplementary material for: Efficacy and Safety of Flexible Versus Fixed Dosing Intervals of Insulin Glargine 300 U/mL in People with Type 2 Diabetes
Source: PubMed Central journal article supplement — Diabetes Technol Ther. 2016 Apr 1;18(4):252–7. doi: 10.1089/dia.2015.0290 (PMC4827283; doi:10.1089/dia.2015.0290), 2016-04-01
Supplement: Supp_Table2.pdf [file Supp_Table2.pdf]

SUPPLEMENTARY TABLE S2. CLINICAL MEASURES FOR THE EDITION 1 AND EDITION 2 SUBSTUDIES  
(MODIFIED INTENT-TO-TREAT POPULATION)

|                                                                         | <i>EDITION 1 substudy</i>     |                            | <i>EDITION 2 substudy</i>     |                            |
|-------------------------------------------------------------------------|-------------------------------|----------------------------|-------------------------------|----------------------------|
|                                                                         | <i>Flexible dosing (n=55)</i> | <i>Fixed dosing (n=53)</i> | <i>Flexible dosing (n=44)</i> | <i>Fixed dosing (n=42)</i> |
| <b>Daily basal insulin dose (U/kg)</b>                                  |                               |                            |                               |                            |
| Baseline of substudy [mean (SD)] <sup>a</sup>                           | 0.98 (0.37)                   | 0.93 (0.39)                | 1.03 (0.36)                   | 0.93 (0.23)                |
| End of substudy (Month 3) [mean (SD)] <sup>b</sup>                      | 1.01 (0.39)                   | 0.96 (0.43)                | 1.08 (0.39)                   | 0.97 (0.26)                |
| Baseline of substudy to end of substudy (Month 3) [LS mean change (SE)] | 0.04 (0.02)                   | 0.04 (0.02)                | 0.05 (0.02)                   | 0.03 (0.02)                |
| LS mean difference (95% CI)                                             | 0.00 (−0.04 to 0.03)          |                            | 0.02 (−0.02 to 0.05)          |                            |
| <b>HbA<sub>1c</sub></b>                                                 |                               |                            |                               |                            |
| Baseline of substudy [mean (SD)] <sup>a</sup>                           |                               |                            |                               |                            |
| %                                                                       | 7.21 (0.91)                   | 7.17 (0.89)                | 7.41 (0.96)                   | 7.47 (1.05)                |
| mmol/mol                                                                | 55.3 (9.9)                    | 54.9 (9.7)                 | 57.5 (10.5)                   | 58.1 (11.5)                |
| End of substudy (Month 3) [mean (SD)] <sup>b</sup>                      |                               |                            |                               |                            |
| %                                                                       | 7.25 (0.96)                   | 7.14 (0.96)                | 7.47 (0.87)                   | 7.49 (1.11)                |
| mmol/mol                                                                | 55.7 (10.5)                   | 54.5 (10.5)                | 58.1 (9.5)                    | 58.3 (12.1)                |
| Baseline of substudy to end of substudy (Month 3) [LS mean change (SE)] |                               |                            |                               |                            |
| %                                                                       | 0.21 (0.11)                   | 0.15 (0.12)                | −0.12 (0.15)                  | −0.25 (0.16)               |
| mmol/mol                                                                | 2.3 (1.2)                     | 1.6 (1.3)                  | −1.3 (1.7)                    | −2.7 (1.8)                 |
| LS mean difference (95% CI)                                             |                               |                            |                               |                            |
| %                                                                       | 0.05 (−0.19 to 0.30)          |                            | 0.13 (−0.15 to 0.42)          |                            |
| mmol/mol                                                                | 0.5 (−2.1 to 3.3)             |                            | 1.4 (−1.7 to 4.5)             |                            |
| <b>FPG</b>                                                              |                               |                            |                               |                            |
| Baseline of substudy [mean (SD)] <sup>a</sup>                           |                               |                            |                               |                            |
| mg/dL                                                                   | 132.1 (37.6)                  | 121.0 (46.3)               | 127.5 (33.0)                  | 128.4 (48.8)               |
| mmol/L                                                                  | 7.3 (2.1)                     | 6.7 (2.6)                  | 7.1 (1.8)                     | 7.1 (2.7)                  |
| End of substudy (Month 3) [mean (SD)] <sup>b</sup>                      |                               |                            |                               |                            |
| mg/dL                                                                   | 137.2 (42.9)                  | 126.1 (55.0)               | 132.9 (41.4)                  | 134.0 (39.0)               |
| mmol/L                                                                  | 7.6 (2.4)                     | 7.0 (3.1)                  | 7.4 (2.3)                     | 7.4 (2.2)                  |
| Baseline of substudy to end of substudy (Month 3) [LS mean change (SE)] |                               |                            |                               |                            |
| mg/dL                                                                   | 25.9 (7.1)                    | 21.0 (7.6)                 | −8.2 (9.6)                    | −4.5 (10.2)                |
| mmol/L                                                                  | 1.44 (0.39)                   | 1.17 (0.42)                | −0.46 (0.53)                  | −0.25 (0.57)               |
| LS mean difference (95% CI)                                             |                               |                            |                               |                            |
| mg/dL                                                                   | 4.9 (−10.6 to 20.3)           |                            | −3.7 (−21.6 to 14.1)          |                            |
| mmol/L                                                                  | 0.27 (−0.59 to 1.13)          |                            | −0.21 (−1.20 to 0.78)         |                            |

<sup>a</sup>Month 6 of the main EDITION study.

<sup>b</sup>Month 9 of the main EDITION study.

CI, confidence interval; FPG, fasting plasma glucose; HbA<sub>1c</sub>, hemoglobin A1c; LS, least squares.
