# Supplementary material for: Efficacy and Safety of Flexible Versus Fixed Dosing Intervals of Insulin Glargine 300 U/mL in People with Type 2 Diabetes
Source: PubMed Central journal article supplement — Diabetes Technol Ther. 2016 Apr 1;18(4):252–7. doi: 10.1089/dia.2015.0290 (PMC4827283; doi:10.1089/dia.2015.0290), 2016-04-01
Supplement: Supp_Table3.pdf [file Supp_Table3.pdf]

SUPPLEMENTARY TABLE S3. HYPOGLYCEMIC EVENTS AT ANY TIME (24 h) AND DURING THE NIGHT (00:00–05:59 h) IN THE FLEXIBLE-DOSING AND FIXED-DOSING GROUPS FOR THE POOLED EDITION 1 AND EDITION 2 SUBSTUDIES (SAFETY POPULATION)

|                                                                             | <i>At any time (24 h)</i>      |                            | <i>Nocturnal (00:00–05:59 h)</i> |                            |
|-----------------------------------------------------------------------------|--------------------------------|----------------------------|----------------------------------|----------------------------|
|                                                                             | <i>Flexible dosing (n=100)</i> | <i>Fixed dosing (n=96)</i> | <i>Flexible dosing (n=100)</i>   | <i>Fixed dosing (n=96)</i> |
| Total participant-years                                                     | 24.82                          | 23.57                      | 24.82                            | 23.57                      |
| Confirmed ( $\leq 70$ mg/dL [ $\leq 3.9$ mmol/L]) or severe hypoglycemia    |                                |                            |                                  |                            |
| Participants with $\geq 1$ event [ <i>n</i> (%)]                            | 47 (47.0)                      | 53 (55.2)                  | 21 (21.0)                        | 22 (22.9)                  |
| Relative risk (95% CI) <sup>a</sup>                                         | 0.85 (0.65–1.11)               |                            | 0.91 (0.54–1.55)                 |                            |
| Events [ <i>n</i> (events per participant-year)]                            | 259 (10.44)                    | 349 (14.81)                | 57 (2.30)                        | 46 (1.95)                  |
| Rate ratio (95% CI) <sup>b</sup>                                            | 0.71 (0.43–1.16)               |                            | 1.18 (0.51–2.70)                 |                            |
| Confirmed ( $< 54$ mg/dL [ $< 3.0$ mmol/L]) or severe hypoglycemia          |                                |                            |                                  |                            |
| Participants with $\geq 1$ event [ <i>n</i> (%)]                            | 17 (17.0)                      | 20 (20.8)                  | 8 (8.0)                          | 9 (9.4)                    |
| Relative risk (95% CI) <sup>a</sup>                                         | 0.81 (0.46–1.44)               |                            | 0.85 (0.34–2.12)                 |                            |
| Events [ <i>n</i> (events per participant-year)]                            | 42 (1.69)                      | 57 (2.42)                  | 15 (0.60)                        | 11 (0.47)                  |
| Rate ratio (95% CI) <sup>b</sup>                                            | 0.70 (0.31–1.56)               |                            | 1.30 (0.39–4.26)                 |                            |
| Documented symptomatic hypoglycemia ( $\leq 70$ mg/dL [ $\leq 3.9$ mmol/L]) |                                |                            |                                  |                            |
| Participants with $\geq 1$ event [ <i>n</i> (%)]                            | 28 (28.0)                      | 36 (37.5)                  | 16 (16.0)                        | 15 (15.6)                  |
| Relative risk (95% CI) <sup>a</sup>                                         | 0.74 (0.50–1.12)               |                            | 1.02 (0.53–1.95)                 |                            |
| Events [ <i>n</i> (events per participant-year)]                            | 149 (6.00)                     | 172 (7.30)                 | 41 (1.65)                        | 29 (1.23)                  |
| Rate ratio (95% CI) <sup>b</sup>                                            | 0.82 (0.45–1.52)               |                            | 1.34 (0.52–3.47)                 |                            |
| Documented symptomatic hypoglycemia ( $< 54$ mg/dL [ $< 3.0$ mmol/L])       |                                |                            |                                  |                            |
| Participants with $\geq 1$ event [ <i>n</i> (%)]                            | 15 (15.0)                      | 16 (16.7)                  | 7 (7.0)                          | 7 (7.3)                    |
| Relative risk (95% CI) <sup>a</sup>                                         | 0.90 (0.47–1.70)               |                            | 0.96 (0.35–2.64)                 |                            |
| Events [ <i>n</i> (events per participant-year)]                            | 39 (1.57)                      | 37 (1.57)                  | 14 (0.56)                        | 9 (0.38)                   |
| Rate ratio (95% CI) <sup>b</sup>                                            | 1.00 (0.44–2.28)               |                            | 1.48 (0.39–5.61)                 |                            |
| Severe hypoglycemia <sup>c</sup>                                            |                                |                            |                                  |                            |
| Participants with $\geq 1$ event [ <i>n</i> (%)]                            | 0 (0)                          | 1 (1.0)                    | 0 (0)                            | 1 (1.0)                    |
| Events [ <i>n</i> (events per participant-year)]                            | 0 (0)                          | 1 (0.04)                   | 0 (0)                            | 1 (0.04)                   |
| Any hypoglycemia                                                            |                                |                            |                                  |                            |
| Participants with $\geq 1$ event [ <i>n</i> (%)]                            | 48 (48.0)                      | 53 (55.2)                  | 22 (22.0)                        | 22 (22.9)                  |
| Relative risk (95% CI) <sup>a</sup>                                         | 0.87 (0.66–1.13)               |                            | 0.96 (0.57–1.61)                 |                            |
| Events [ <i>n</i> (events per participant-year)]                            | 266 (10.72)                    | 358 (15.19)                | 58 (2.34)                        | 46 (1.95)                  |
| Rate ratio (95% CI) <sup>b</sup>                                            | 0.71 (0.43–1.16)               |                            | 1.20 (0.53–2.73)                 |                            |

<sup>a</sup>Relative risk of participants experiencing one or more hypoglycemic event for flexible-dosing intervals versus fixed-dosing intervals.

<sup>b</sup>Rate ratio of annualized hypoglycemic event rates for flexible-dosing intervals versus fixed-dosing intervals.

<sup>c</sup>Relative risk and rate ratio not estimated owing to low numbers.

CI, confidence interval.
