# Supplementary material for: Efficacy and Safety of Flexible Versus Fixed Dosing Intervals of Insulin Glargine 300 U/mL in People with Type 2 Diabetes
Source: PubMed Central journal article supplement — Diabetes Technol Ther. 2016 Apr 1;18(4):252–7. doi: 10.1089/dia.2015.0290 (PMC4827283; doi:10.1089/dia.2015.0290), 2016-04-01
Supplement: Supp_Table4.pdf [file Supp_Table4.pdf]

SUPPLEMENTARY TABLE S4. HYPOGLYCEMIC EVENTS AT ANY TIME (24 H) AND DURING THE NIGHT (00:00–05:59 H) IN THE EDITION 1 SUBSTUDY (SAFETY POPULATION)

|                                                                             | <i>At any time (24 h)</i>     |                            | <i>Nocturnal (00:00–05:59 h)</i> |                            |
|-----------------------------------------------------------------------------|-------------------------------|----------------------------|----------------------------------|----------------------------|
|                                                                             | <i>Flexible dosing (n=56)</i> | <i>Fixed dosing (n=53)</i> | <i>Flexible dosing (n=56)</i>    | <i>Fixed dosing (n=53)</i> |
| Total participant-years                                                     | 13.82                         | 13.15                      | 13.82                            | 13.15                      |
| Confirmed ( $\leq 70$ mg/dL [ $\leq 3.9$ mmol/L]) or severe hypoglycemia    |                               |                            |                                  |                            |
| Participants with $\geq 1$ event [ <i>n</i> (%)]                            | 31 (55.4)                     | 35 (66.0)                  | 14 (25.0)                        | 12 (22.6)                  |
| Events [ <i>n</i> (events per participant-year)]                            | 187 (13.53)                   | 262 (19.92)                | 33 (2.39)                        | 22 (1.67)                  |
| Confirmed ( $< 54$ mg/dL [ $< 3.0$ mmol/L]) or severe hypoglycemia          |                               |                            |                                  |                            |
| Participants with $\geq 1$ event [ <i>n</i> (%)]                            | 13 (23.2)                     | 15 (28.3)                  | 4 (7.1)                          | 7 (13.2)                   |
| Events [ <i>n</i> (events per participant-year)]                            | 30 (2.17)                     | 47 (3.57)                  | 10 (0.72)                        | 8 (0.61)                   |
| Documented symptomatic hypoglycemia ( $\leq 70$ mg/dL [ $\leq 3.9$ mmol/L]) |                               |                            |                                  |                            |
| Participants with $\geq 1$ event [ <i>n</i> (%)]                            | 18 (32.1)                     | 22 (41.5)                  | 11 (19.6)                        | 8 (15.1)                   |
| Events [ <i>n</i> (events per participant-year)]                            | 114 (8.25)                    | 119 (9.05)                 | 30 (2.17)                        | 11 (0.84)                  |
| Documented symptomatic hypoglycemia ( $< 54$ mg/dL [ $< 3.0$ mmol/L])       |                               |                            |                                  |                            |
| Participants with $\geq 1$ event [ <i>n</i> (%)]                            | 11 (19.6)                     | 11 (20.8)                  | 3 (5.4)                          | 5 (9.4)                    |
| Events [ <i>n</i> (events per participant-year)]                            | 28 (2.03)                     | 27 (2.05)                  | 9 (0.65)                         | 6 (0.46)                   |
| Severe hypoglycemia                                                         |                               |                            |                                  |                            |
| Participants with $\geq 1$ event [ <i>n</i> (%)]                            | 0 (0)                         | 1 (1.9)                    | 0 (0)                            | 1 (1.9)                    |
| Events [ <i>n</i> (events per participant-year)]                            | 0 (0)                         | 1 (0.08)                   | 0 (0)                            | 1 (0.08)                   |
| Any hypoglycemia                                                            |                               |                            |                                  |                            |
| Participants with $\geq 1$ event [ <i>n</i> (%)]                            | 32 (57.1)                     | 35 (66.0)                  | 15 (26.8)                        | 12 (22.6)                  |
| Events [ <i>n</i> (events per participant-year)]                            | 193 (13.97)                   | 262 (19.92)                | 34 (2.46)                        | 22 (1.67)                  |
