# Supplementary material for: Efficacy and Safety of Flexible Versus Fixed Dosing Intervals of Insulin Glargine 300 U/mL in People with Type 2 Diabetes
Source: PubMed Central journal article supplement — Diabetes Technol Ther. 2016 Apr 1;18(4):252–7. doi: 10.1089/dia.2015.0290 (PMC4827283; doi:10.1089/dia.2015.0290), 2016-04-01
Supplement: Supp_Table5.pdf [file Supp_Table5.pdf]

SUPPLEMENTARY TABLE S5. HYPOGLYCEMIC EVENTS AT ANY TIME (24 H) AND DURING THE NIGHT (00:00–05:59 H) IN THE EDITION 2 SUBSTUDY (SAFETY POPULATION)

|                                                                             | <i>At any time (24 h)</i>     |                            | <i>Nocturnal (00:00–05:59 h)</i> |                            |
|-----------------------------------------------------------------------------|-------------------------------|----------------------------|----------------------------------|----------------------------|
|                                                                             | <i>Flexible dosing (n=44)</i> | <i>Fixed dosing (n=43)</i> | <i>Flexible dosing (n=44)</i>    | <i>Fixed dosing (n=43)</i> |
| Total participant-years                                                     | 11.00                         | 10.42                      | 11.00                            | 10.42                      |
| Confirmed ( $\leq 70$ mg/dL [ $\leq 3.9$ mmol/L]) or severe hypoglycemia    |                               |                            |                                  |                            |
| Participants with $\geq 1$ event [ <i>n</i> (%)]                            | 16 (36.4)                     | 18 (41.9)                  | 7 (15.9)                         | 10 (23.3)                  |
| Events [ <i>n</i> (events per participant-year)]                            | 72 (6.55)                     | 87 (8.35)                  | 24 (2.18)                        | 24 (2.30)                  |
| Confirmed ( $< 54$ mg/dL [ $< 3.0$ mmol/L]) or severe hypoglycemia          |                               |                            |                                  |                            |
| Participants with $\geq 1$ event [ <i>n</i> (%)]                            | 4 (9.1)                       | 5 (11.6)                   | 4 (9.1)                          | 2 (4.7)                    |
| Events [ <i>n</i> (events per participant-year)]                            | 12 (1.09)                     | 10 (0.96)                  | 5 (0.45)                         | 3 (0.29)                   |
| Documented symptomatic hypoglycemia ( $\leq 70$ mg/dL [ $\leq 3.9$ mmol/L]) |                               |                            |                                  |                            |
| Participants with $\geq 1$ event [ <i>n</i> (%)]                            | 10 (22.7)                     | 14 (32.6)                  | 5 (11.4)                         | 7 (16.3)                   |
| Events [ <i>n</i> (events per participant-year)]                            | 35 (3.18)                     | 53 (5.09)                  | 11 (1.00)                        | 18 (1.73)                  |
| Documented symptomatic hypoglycemia ( $< 54$ mg/dL [ $< 3.0$ mmol/L])       |                               |                            |                                  |                            |
| Participants with $\geq 1$ event [ <i>n</i> (%)]                            | 4 (9.1)                       | 5 (11.6)                   | 4 (9.1)                          | 2 (4.7)                    |
| Events [ <i>n</i> (events per participant-year)]                            | 11 (1.00)                     | 10 (0.96)                  | 5 (0.45)                         | 3 (0.29)                   |
| Severe hypoglycemia                                                         |                               |                            |                                  |                            |
| Participants with $\geq 1$ event [ <i>n</i> (%)]                            | 0 (0)                         | 0 (0)                      | 0 (0)                            | 0 (0)                      |
| Events [ <i>n</i> (events per participant-year)]                            | 0 (0)                         | 0 (0)                      | 0 (0)                            | 0 (0)                      |
| Any hypoglycemia                                                            |                               |                            |                                  |                            |
| Participants with $\geq 1$ event [ <i>n</i> (%)]                            | 16 (36.4)                     | 18 (41.9)                  | 7 (15.9)                         | 10 (23.3)                  |
| Events [ <i>n</i> (events per participant-year)]                            | 73 (6.64)                     | 96 (9.21)                  | 24 (2.18)                        | 24 (2.30)                  |
